# Supplementary material for: Fabrication of monodispersed Au@Ag bimetallic nanorod-loaded nanofibrous membrane with fast thermo-responsiveness and its use as a smart free-standing SERS substrate
Source: Royal Society of Chemistry journal article supplement (doi:10.1039/c6ra04247c), 2016-01-01
Supplement: c6ra04247c1.pdf [file c6ra04247c1.pdf]

## Electronic supplementary information

### **Fabrication of monodisperse Au@Ag bimetallic nanorods loaded nanofibrous membrane with fast thermo-responsiveness and its use as a smart free-standing SERS substrate**

Siyuan Chen,<sup>a</sup> Liying Wang,<sup>a</sup> Xu Dong,<sup>b</sup> Xiaoyun Liu,<sup>c\*</sup> Jianfeng Zhou,<sup>b</sup> Jianmao Yang<sup>c</sup> and Liusheng Zha<sup>a,c\*</sup>

<sup>a</sup> State Key Laboratory for Modification of Chemical Fibers and Polymer Materials & College of Materials Science and Engineering, Donghua University, Shanghai 201620, P. R. China. E-mail: lszha@dhu.edu.cn Tel: +86-021-67792824

<sup>b</sup> State Key Laboratory of Molecular Engineering of Polymers and Department of Macromolecule Science, Fudan University, Shanghai 200433, P. R. China..

<sup>c</sup> Research Center for Analysis and Measurement, Donghua University, Shanghai 201620, P. R. China. E-mail: xyliu@dhu.edu.cn Tel: +86-021-67792284

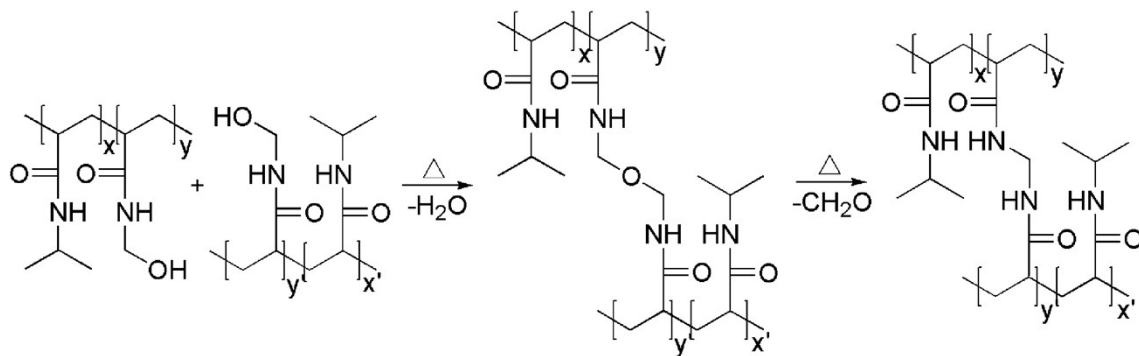

**Scheme S1.** Intermolecular crosslinking reaction between NMA units of PNN

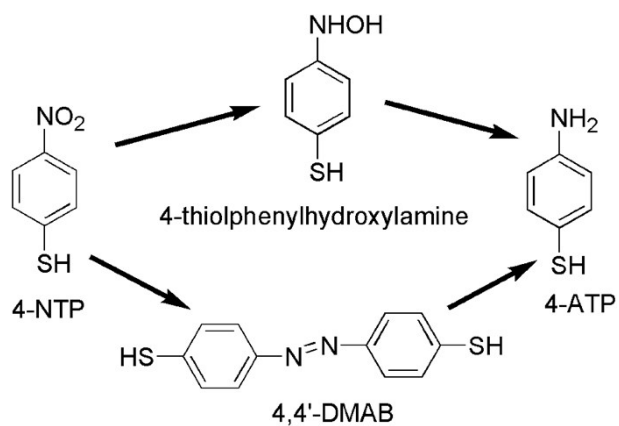

**Scheme S2.** Intermediates proposed for 4-NTP to 4-ATP reduction (top: direct route via a hydroxylamine intermediate; bottom: condensation route through the formation of 4,4'-dimercaptoazobenzene (4,4'-DMAB)

)

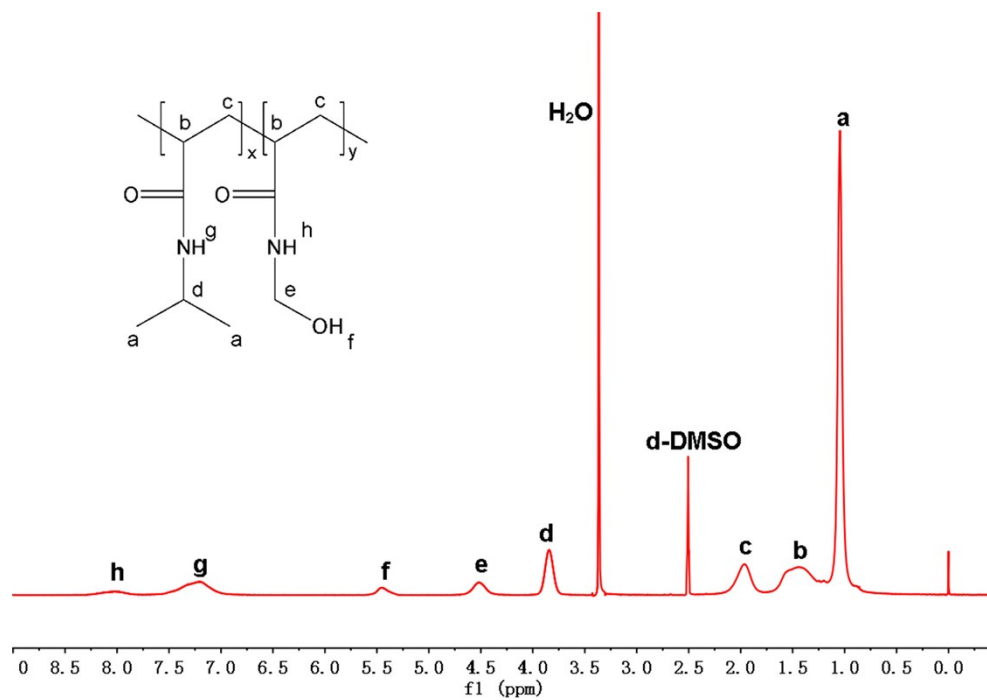

(a)

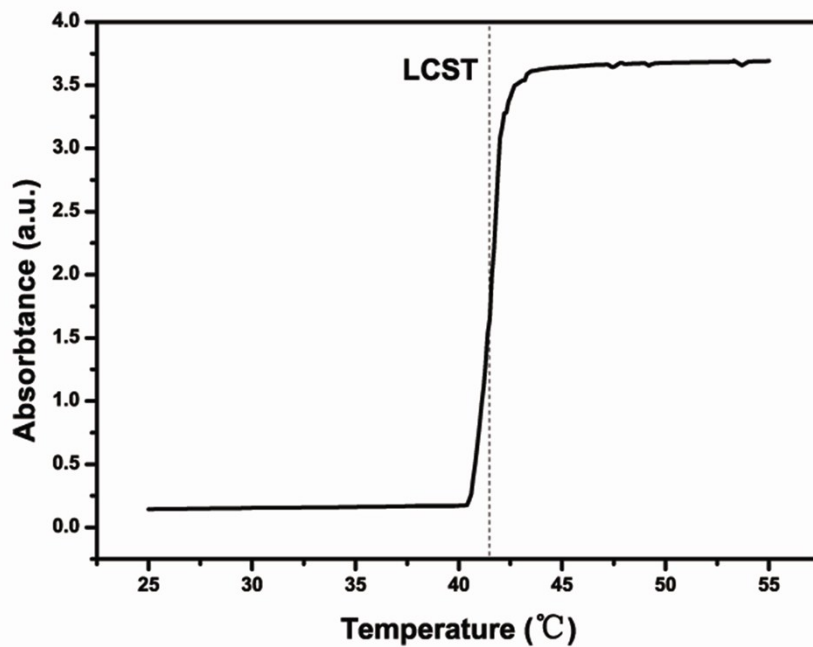

(b)

**Figure S1.** <sup>1</sup>H NMR spectrum of PNN (a) and temperature dependent absorbance of PNN aqueous solution (b)

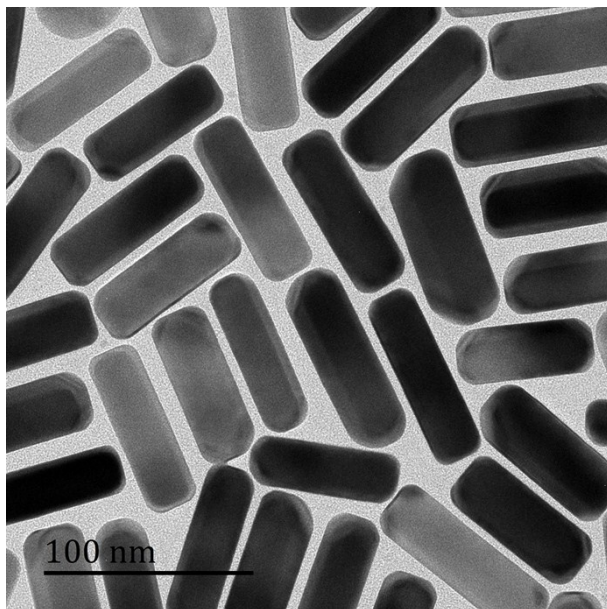

(a)

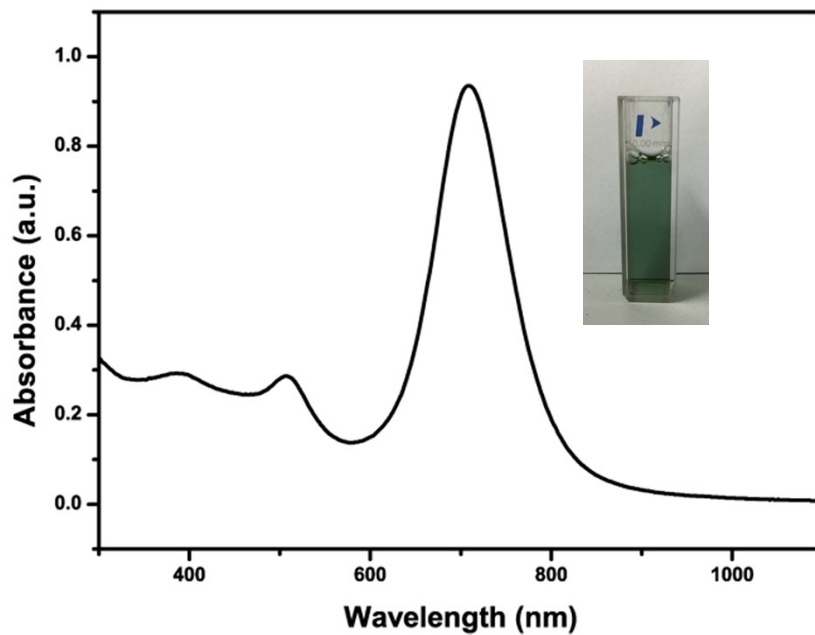

(b)

**Figure S2.** TEM image of Au@AgNRs (a) and UV-vis-NIR spectrum of Au@AgNRs aqueous dispersion (inset is its optical image) (b)

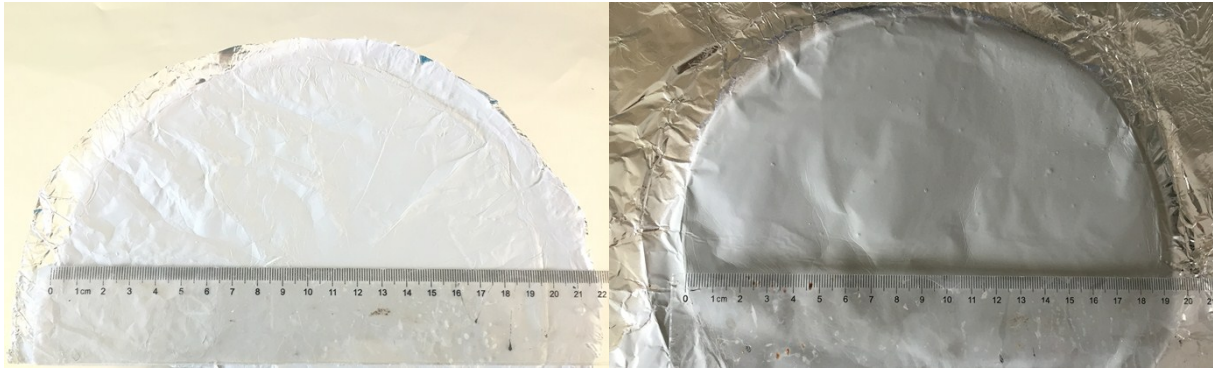

(a)

(b)

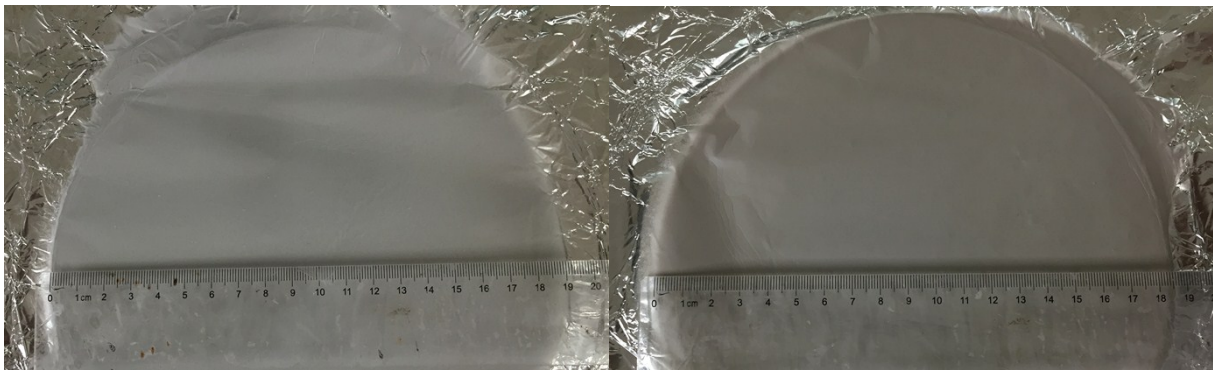

(c)

(d)

**Figure S3.** Optical images of control sample (a) and Au@AgNRs/PNN composite nanofibrous membranes (HNF-1 (b), HNF-2 (c), HNF-3 (d))

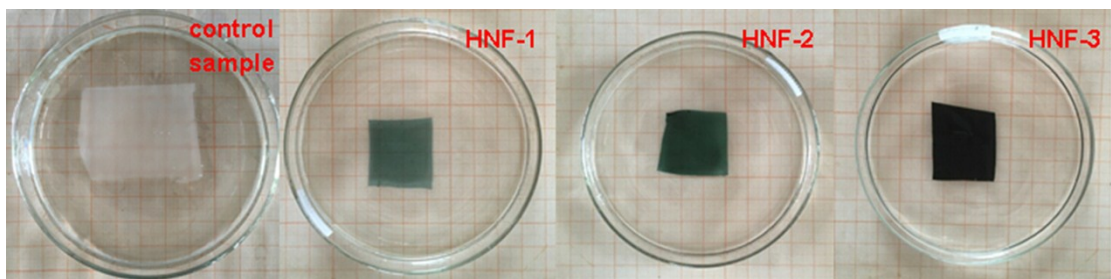

(a)

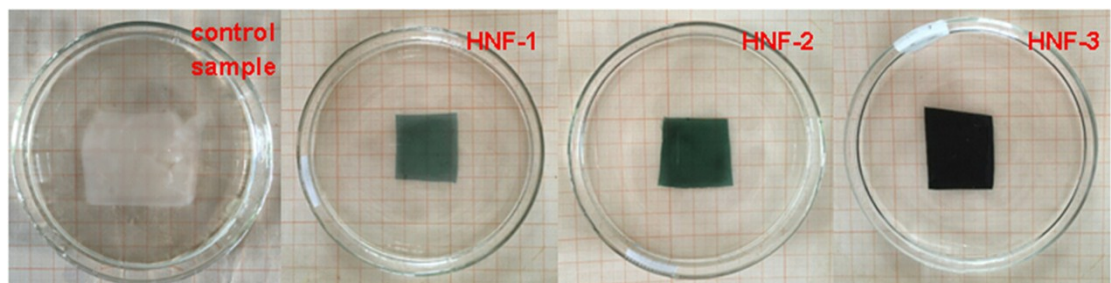

(b)

**Figure S4.** Optical images of control sample and Au@AgNRs/PNN composite nanofibrous membranes in water before (a) and after (b) oscillation (100 rpm×2 h)

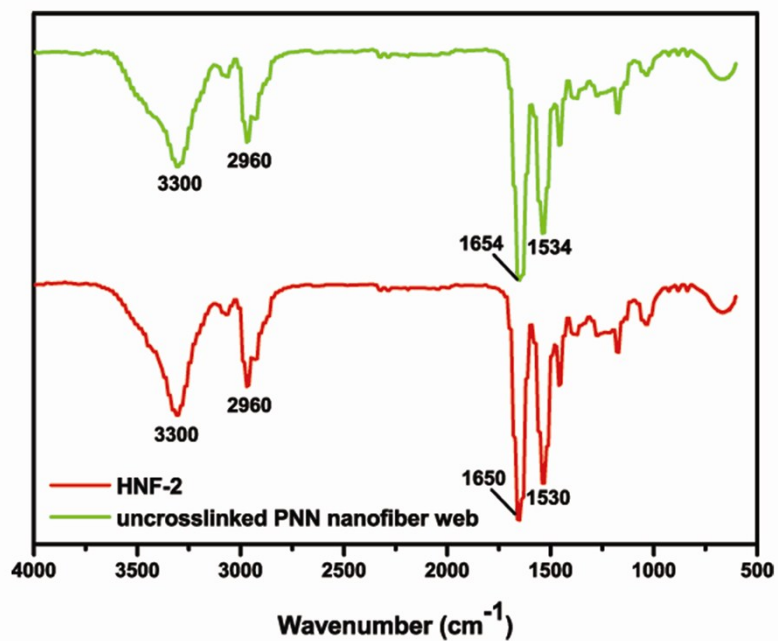

**Figure S5.** FTIR spectra of uncrosslinked PNN nanofibrous membrane and HNF-2

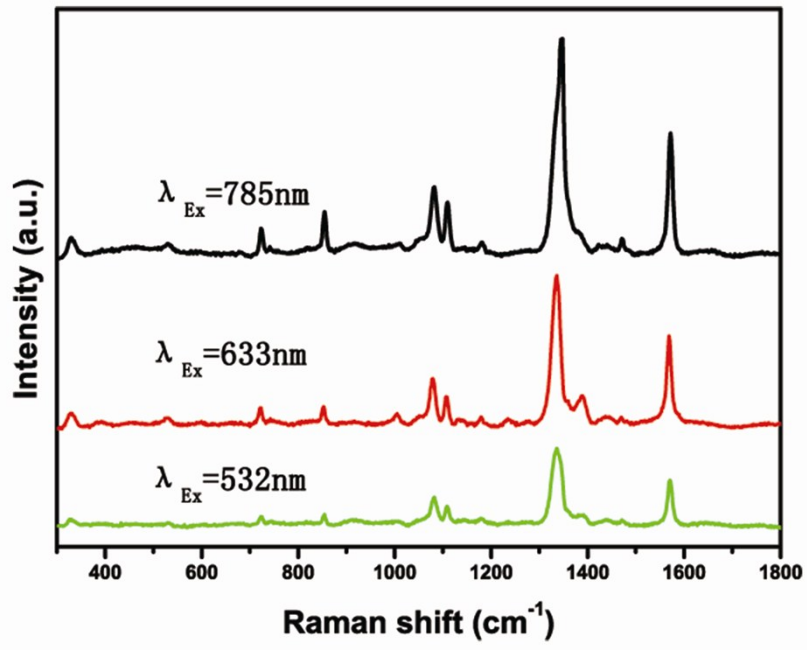

(a)

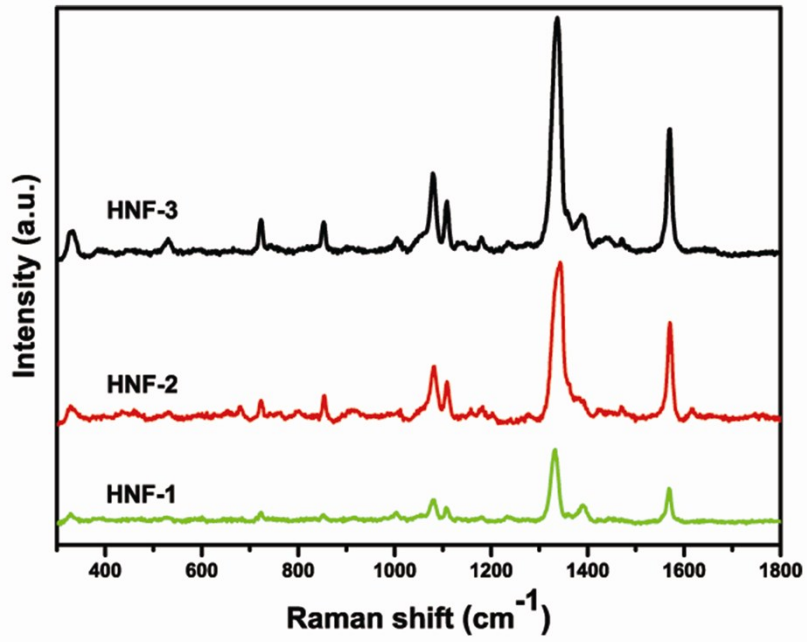

(b)

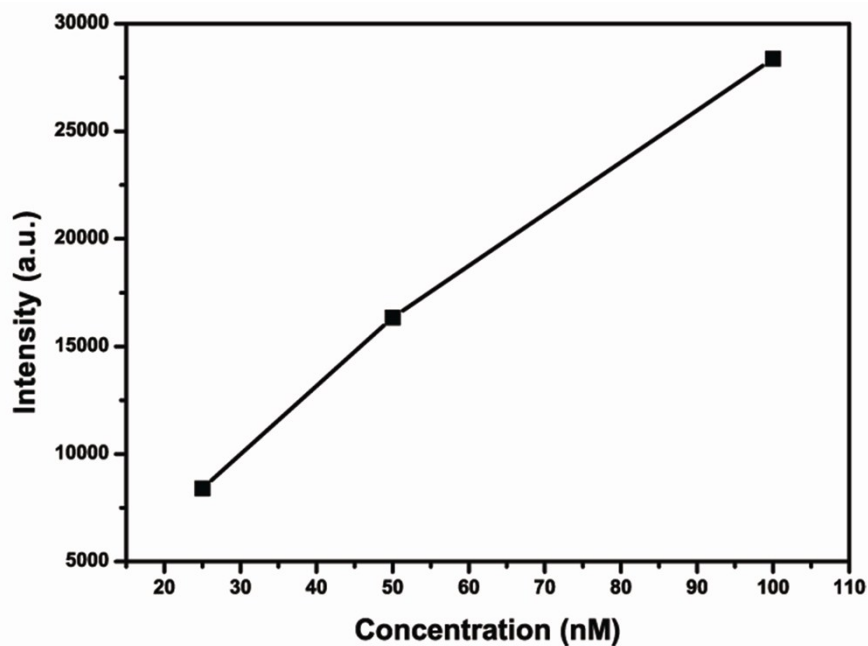

(c)

**Figure S6.** (a) SERS spectra of  $10^{-7}$  M 4-NTP aqueous solution based on Au@AgNRs/PNN composite nanofibrous membranes (HNF-2) as substrate at three different excitation wavelengths (532 nm, 633 nm, 785 nm); (b) SERS spectra of  $10^{-7}$  M 4-NTP aqueous solution based on the composite nanofibrous membranes with three different Au@AgNRs contents as the substrates, respectively (785 nm excitation); (c) The plot of the  $1334\text{ cm}^{-1}$  peak intensity against the Au@AgNRs concentration in the spinning solution of the composite nanofibrous membranes.



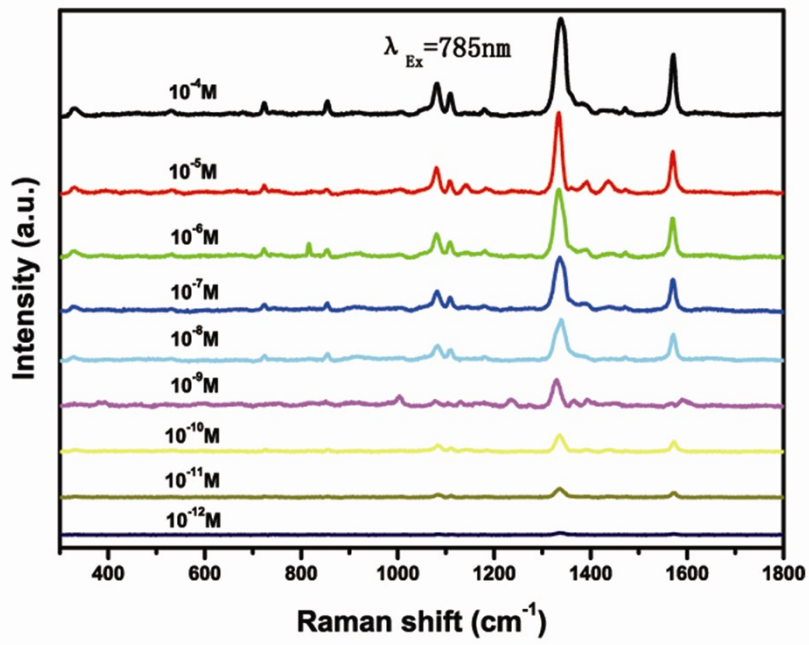

(a)

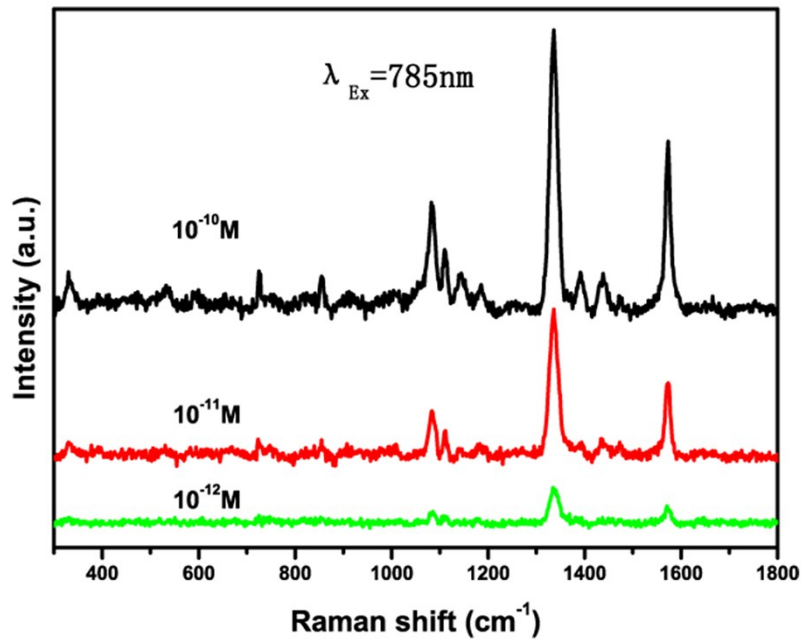

(b)

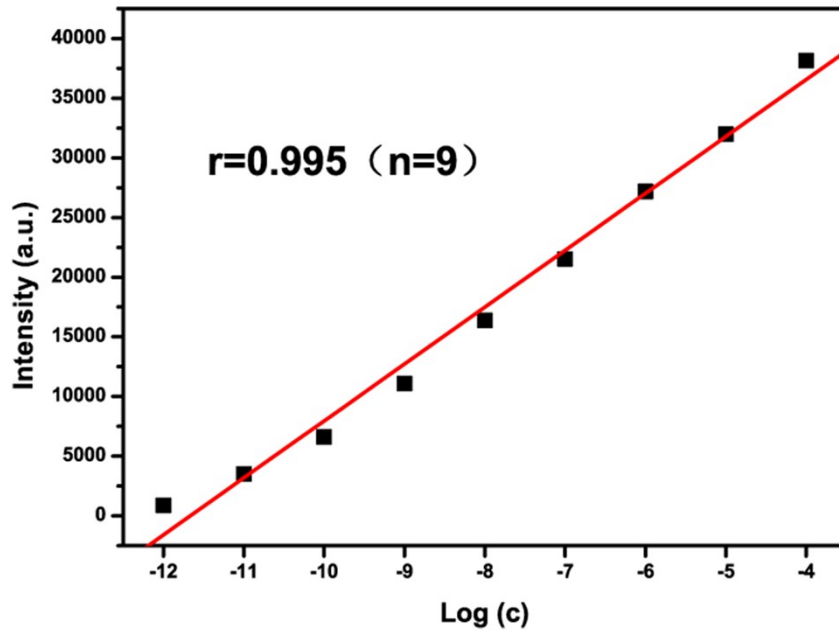

(c)

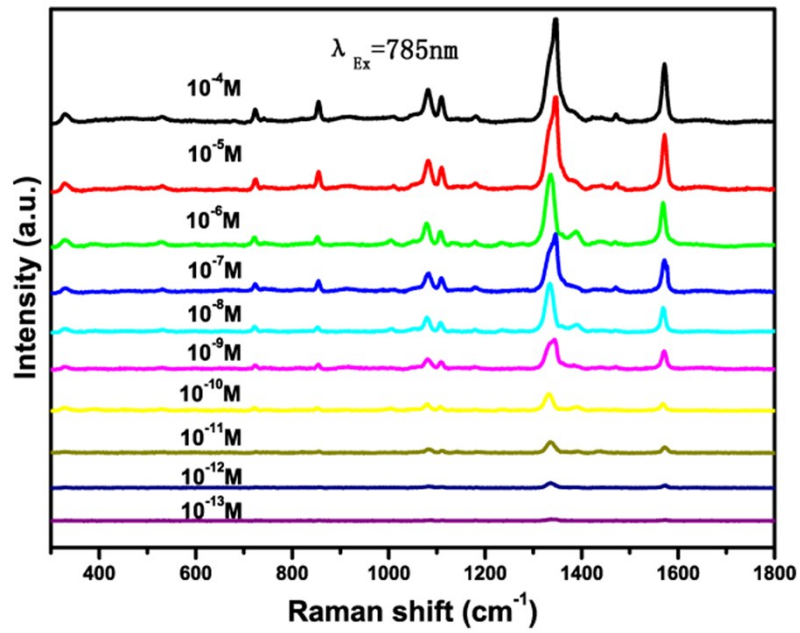

(d)

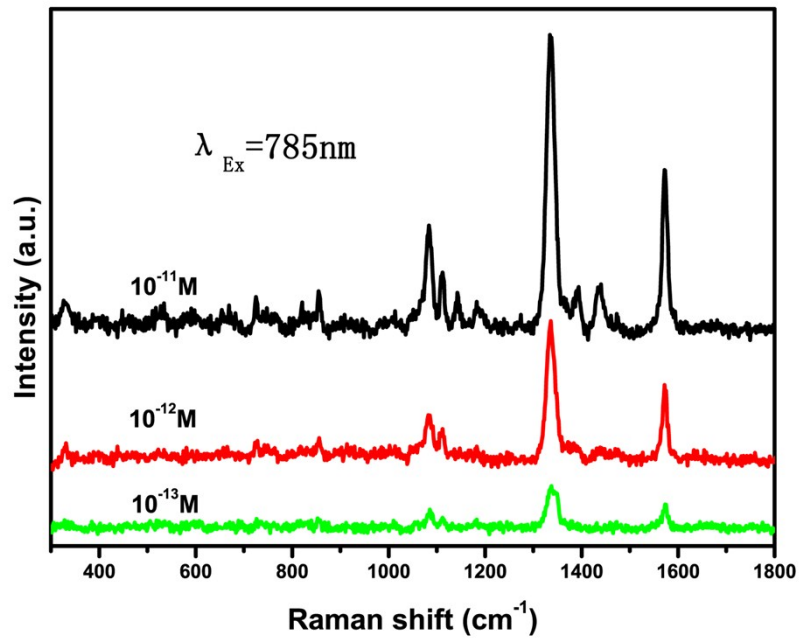

(e)

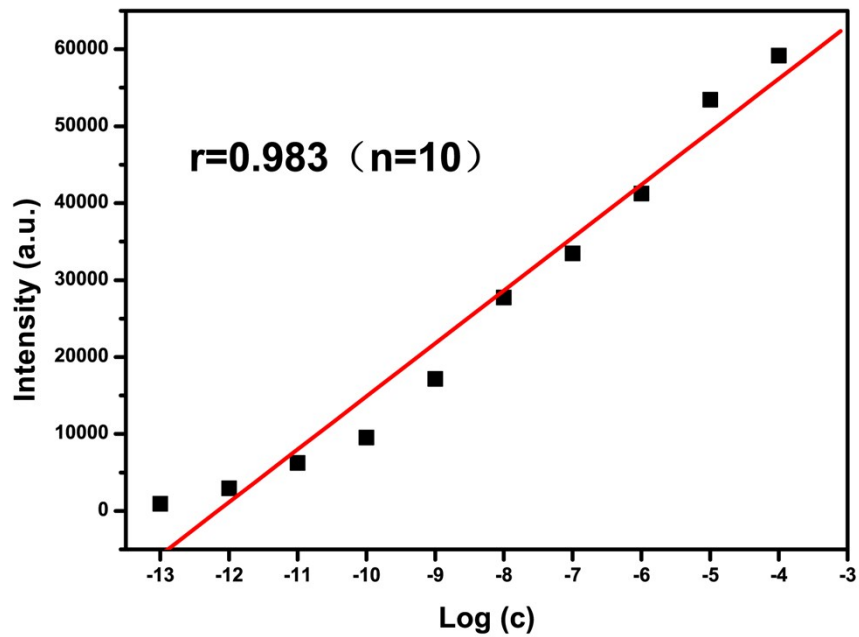

(f)

**Figure S7.** (a) SERS spectra of different concentrations of 4-NTP in aqueous solution based on HNF-1 as substrate with 785 nm excitation; (b) Amplified SERS spectra of low concentrations of 4-NTP in (a); (c) Plot of

the  $1334\text{ cm}^{-1}$  peak intensity in (a) vs.  $\log(c)$  of 4-NTP; (d) SERS spectra of different concentrations of 4-NTP in aqueous solution based on HNF-3 as substrate with 785 nm excitation; (e) Amplified SERS spectra of low concentrations of 4-NTP in (d); (f) Plot of the  $1334\text{ cm}^{-1}$  peak intensity in (d) vs.  $\log(c)$  of 4-NTP.
